# Supplementary material
Source: Springer Nature journal article supplement (https://www.springermedizin.de/resource/supplementary/12888_2007_258_MOESM1_ESM.pdf/9482356)
Supplement: MOESM1 [file 9482356]

|                                                                                                                                                                                                                                                                                                                                                                                                                                                                                                                                                                                                                                                                                                                                                                                                          | Do not agree at all | Agree slightly | Agree a lot | Agree completely |
|----------------------------------------------------------------------------------------------------------------------------------------------------------------------------------------------------------------------------------------------------------------------------------------------------------------------------------------------------------------------------------------------------------------------------------------------------------------------------------------------------------------------------------------------------------------------------------------------------------------------------------------------------------------------------------------------------------------------------------------------------------------------------------------------------------|---------------------|----------------|-------------|------------------|
| <p><b>Self-reflectiveness</b></p> <p>1. At times I have misunderstood other people's attitudes towards me</p> <p>3. Other people may be more objective about the cause of my unpleasant experiences than I am.</p> <p>4. I have jumped to conclusions too fast.</p> <p>5. Some of my experiences that seemed very real may have been due to my imagination.</p> <p>6. Some of the ideas that I was certain were true turned out to be false.</p> <p>8. Even though I feel strongly that I was right I could be wrong.</p> <p>12. If somebody points out that my beliefs are wrong I am willing to consider it.</p> <p>14. There is often more than one possible explanation for why people act the way they do</p> <p>15. My unusual experiences may be due to me being extremely upset or stressed.</p> |                     |                |             |                  |
| <p><b>Self-certainty</b></p> <p>2. My interpretations of my experiences are definitively right.</p> <p>7. If something feels right, it means that it is right.</p> <p>9. I know better than anyone else what my problems are</p> <p>10. When people disagree with me, they are generally wrong.</p> <p>11. I cannot trust other people's opinion about my experiences.</p> <p>13. I can trust my own judgment at all times.</p>                                                                                                                                                                                                                                                                                                                                                                          |                     |                |             |                  |
